RESEARCH ARTICLE

# Disparate Modes of Evolution Shaped Modern Prion (*PRNP*) and Prion-Related Doppel (*PRND*) Variation in Domestic Cattle

Brian W. Brunelle<sup>1‡</sup>, Allison M. O'Grady<sup>1</sup>, Eric M. Nicholson<sup>1\*</sup>, Christopher M. Seabury<sup>2\*</sup>

**1** Virus and Prion Research Unit, National Animal Disease Center, USDA, Agricultural Research Service, Ames, Iowa 50010, United States of America, **2** Department of Veterinary Pathobiology, College of Veterinary Medicine, Texas A&M University, College Station, Texas 77843-4467, United States of America

‡ Current address: Food Safety and Enteric Pathogens Research Unit, National Animal Disease Center, USDA, Agricultural Research Service, Ames, Iowa 50010, United States of America

\* [Eric.Nicholson@ars.usda.gov](mailto:Eric.Nicholson@ars.usda.gov) (EMN); [CSeabury@cvm.tamu.edu](mailto:CSeabury@cvm.tamu.edu) (CMS)

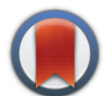

CrossMark  
click for updates

OPEN ACCESS

**Citation:** Brunelle BW, O'Grady AM, Nicholson EM, Seabury CM (2016) Disparate Modes of Evolution Shaped Modern Prion (*PRNP*) and Prion-Related Doppel (*PRND*) Variation in Domestic Cattle. PLoS ONE 11(5): e0155924. doi:10.1371/journal.pone.0155924

**Editor:** Ilia V Baskakov, University of Maryland School of Medicine, UNITED STATES

**Received:** March 30, 2016

**Accepted:** May 6, 2016

**Published:** May 25, 2016

**Copyright:** This is an open access article, free of all copyright, and may be freely reproduced, distributed, transmitted, modified, built upon, or otherwise used by anyone for any lawful purpose. The work is made available under the [Creative Commons CC0](https://creativecommons.org/licenses/by/4.0/) public domain dedication.

**Data Availability Statement:** All relevant data are within the paper and its Supporting Information files. All DNA sequences used to generate the data are available on Genbank and the accession numbers (JF808218-JF808446) are indicated in the text.

**Funding:** This work was funded in its entirety by congressional appropriation to the USDA-ARS. The funders had no role in study design, data collection and analysis, decision to publish, or preparation of the manuscript.

## Abstract

Previous investigations aimed at determining whether the mammalian prion protein actually facilitates tangible molecular aspects of either a discrete or pleiotropic functional niche have been debated, especially given the apparent absence of overt behavioral or physiological phenotypes associated with several mammalian prion gene (*PRNP*) knockout experiments. Moreover, a previous evaluation of *PRNP* knockout cattle concluded that they were normal, suggesting that the bovine prion protein is physiologically dispensable. Herein, we examined the frequency and distribution of nucleotide sequence variation within the coding regions of bovine *PRNP* and the adjacent Doppel (*PRND*) gene, a proximal paralogue to *PRNP* on BTA13. Evaluation of *PRND* variation demonstrated that the gene does not depart from a strictly neutral model of molecular evolution, and would therefore not be expected to influence tests of selection within *PRNP*. Collectively, our analyses confirm that intense purifying selection is indeed occurring directly on bovine *PRNP*, which is indicative of a protein with an important role. These results suggest that the lack of observed fitness effects may not manifest in the controlled environmental conditions used to care for and raise *PRNP* knockout animals.

## Introduction

Transmissible spongiform encephalopathies (TSE) are a class of fatal neurodegenerative diseases that affect humans as well as livestock and wildlife in farmed and natural environments [1]. Human TSEs, such as Creutzfeldt-Jakob disease (CJD), variant CJD, Gerstmann Sträusler-Scheinker disease, and kuru are typically identified via observed clinical signs and post-mortem analyses [2]. Animal TSEs have largely been classified in the same manner and include transmissible mink encephalopathy, scrapie of sheep and goats, chronic wasting disease in free-ranging and captive species of Cervidae, feline spongiform encephalopathy, and bovine

**Competing Interests:** The authors have declared that no competing interests exist.

spongiform encephalopathy [2]. Importantly, the most profound unifying feature of these diseases is the accumulation of an infectious protease-resistant isoform (PrP<sup>Sc</sup>) of the host-encoded cellular prion protein (PrP<sup>C</sup>) within tissues of the central nervous system [1].

Notably, the prion protein gene (*PRNP*) is present in all vertebrate species [3], and the striking degree of amino acid conservation observed across a wide variety of highly divergent taxa suggests an important functional role for PrP<sup>C</sup> [4]. Nevertheless, this evolutionary observation has been paradoxically shrouded by several knockout studies that failed to elucidate one or more overt physiological roles for PrP<sup>C</sup> [5–7]. The implication that PrP<sup>C</sup> deficient cattle may be considered safe mainstays for enhancing future agricultural products [8] is also in direct conflict with a previous investigation that provided unequivocal population and phylogenetic evidence for intense purifying selection constraining the long-term evolution of bovine *PRNP* [9]. Strong levels of purifying selection similar to that observed for bovine *PRNP* are normally only detected for genes encoding functionally important endogenous host proteins such as histones or ubiquitin [10, 11]. In the absence of function, what might explain such intense purifying selection?

The primary goal of this study was to determine whether strong purifying selection is acting directly on bovine *PRNP* [9], or if the selective signal actually radiates from a proximal bovine protein coding gene. Notably, the two proximal genes flanking bovine *PRNP* on BTA13 are *ZMYND11* (~202 kb upstream) and *PRND* (~31 kb downstream). *ZMYND11* encodes a transcriptional regulator protein that binds to adenovirus E1A proteins [12] while *PRND* encodes the doppel protein (Dpl), an evolutionarily related paralogue of *PRNP* believed to be involved in sperm maturation and capacitation [13]. Given the physical proximity between *PRNP* and *PRND* [14], as well as phylogenetic evidence that the two genes have been evolutionarily co-selected [15], we tested the hypothesis that strong selection within bovine *PRND* may be explanatory for selective signals previously detected in bovine *PRNP* [9]. Collectively, our analyses provide statistical support for intense purifying selection operating on bovine *PRNP*, with bovine *PRND* variation exhibiting no evidence for deviation from a strictly neutral model.

## Materials and Methods

### DNA panels

To comprehensively evaluate nucleotide sequence variation within bovine *PRNP* and *PRND*, we compiled and utilized data derived from 228 DNA samples previously employed to investigate bovine *PRNP* [16–18], including representatives of *Bos taurus taurus*, *Bos taurus indicus*, and their hybrids (composites). For *PRND* analysis, we used these same bovine samples, which included DNA extracted from 39 Holstein steers [17] and 189 commercially available spermatozoa samples of unrelated sires from the following 41 cattle breeds: Angus (4), Beefmaster (4), Belgian Blue (4), Blonde D'Aquitaine (5), Braford (4), Brahman (28), Brahmousin (2), Brangus (12), Braunvieh (5), Brown Swiss (4), Charolais (5), Chianina-Chiangus (5), Corriente (1), Gelbvieh (4), Gir (12), Guzerat (1), Hereford (3), Holstein (4), Limousin (3), Maine Anjou (4), Murray Gray (2), Nelore (8), Normande (1), Piedmontese (2), Red Angus (4), Red Brangus (1), Red Poll (1), Romagnola (2), Salers (3), Santa Gertrudis (9), Scottish Highland (1), Senepol (2), Shorthorn (19), Simbrah (3), Simmental (8), Tabapua (1), Tarentaise (1), Texas Longhorn (4), Three-way-cross (2), and White Park (1) [16, 18].

### *PRND* sequencing and multiple sequence alignments

Polymerase chain reaction primers amplifying a 991 bp product encompassing the entire *PRND* coding region were designed from the Genbank reference sequence DQ205538 (5'-AGATCACTATCCTGAATGGTG-3', 5'-TTTAGGTAGAGCCTGGAGAG-3'). Each 25- $\mu$ L PCR

reaction contained 50 ng of genomic DNA, 1x PCR buffer with 1.5 mM MgCl<sub>2</sub>, 1 mM each dNTP, 0.8 μM of each primer, and 1.5 units of Taq polymerase. Amplification conditions were as follows: 94°C for 1 min; 35 cycles of 94°C for 30s, 56°C for 30s, 72°C for 30s; 72°C for 2 min; 4°C hold. PCR products were visualized and verified on 2% NuSieve gels (Cambrex, Rockland, ME) and subsequently treated with ExoSAP-IT (GE Healthcare, Piscataway, NJ) for purification. Purified *PRND* PCR products were directly sequenced using the amplification primers and a pair of internal primers (5'-TTGCCAAGTACCTCCCAG-3', 5'-TTTCCTTGTTGACATTGG-3') in conjunction with standard dye terminator cycle sequencing technology. Individual *PRND* contig sequences were assembled for each sample using Lasergene 6 (DNASTAR, Inc., Madison, WI). Thereafter, *PRND* sequences were aligned using ClustalX [19] and submitted to GenBank (accession numbers JF808218-JF808446). Likewise, bovine *PRNP* exon 3 sequences [9, 16, 17] were also aligned using ClustalX [19] as previously described [9].

### Haplotype inference and network analysis

For haplotypes that were not phase-resolved through a second round of PCR, cloning, and bidirectional sequencing [9], we assembled unphased diploid genotypes for nucleotide sequence variation observed within the coding regions of bovine *PRNP* and *PRND*, including both single nucleotide polymorphisms (SNPs) and insertion-deletion mutations (indels). Bovine *PRNP* and *PRND* haplotype reconstructions were performed with PHASE 2.1 [20, 21] using all intragenic polymorphisms, all cattle ( $n = 228$ ), and the—X10 option as previously described [22]. Haplotype phases previously established for 112 of the *PRNP* samples [9] were designated as phase-known for haplotype reconstruction.

Median joining haplotype networks for bovine *PRNP* and *PRND* were constructed using the program Network 4.5.1.0 (Fluxus Technology Ltd) in conjunction with the suggested character weights of 10 for SNPs and 20 for indels. Network branch angles were adjusted to ensure clarity without modifying branch lengths.

### Sequence analysis

Phased *PRNP* and *PRND* sequences were used in conjunction with the software program DnaSP 5.1 [23] to estimate the number of potentially synonymous and non-synonymous nucleotide sites, the number of synonymous and non-synonymous polymorphisms, and the number of synonymous ( $d_S$ ) and non-synonymous ( $d_N$ ) substitutions per site with Jukes-Cantor correction [24, 25]. Of the 456 phased resolved *PRNP* sequences evaluated, 19 had alignment gaps in the octapeptide repeat region and were excluded from the synonymous and non-synonymous analysis.

### Tests of selection

To evaluate potential deviations from a strictly neutral model of molecular evolution, we used the Z-test implemented in MEGA 4 [26] to evaluate the null hypothesis that  $d_N = d_S$  (strict neutrality; two-tailed test) and the research hypothesis  $d_N < d_S$  (one-tailed test) using pair-wise deletion of alignment gaps with Jukes-Cantor correction. For pairwise tests of selection, we estimated the variance of ( $d_N - d_S$ ) via bootstrap analysis with 1000 replicates. Frequency distribution tests, including Tajima's D [27] and Fu and Li's Tests (D\* and F\*) [28], were performed in DnaSP v5.1 [23] using all *PRNP* and *PRND* coding region polymorphisms (excluding gaps). Significance was assessed for each test by estimating confidence intervals through coalescent simulations using the observed number of segregating sites with 5,000 replicates [23]. All tests were conducted both with and without the 19 *PRNP* haplotypes possessing alignment gaps. The program GARD (Genetic Algorithm for Recombination Detection) was

used to detect the presence of recombination in the *PRND* and *PRNP* sequences [29]. No overt evidence of recombination was detected. The potential for episodic and pervasive selective pressures was estimated for the unique haplotypes using the tree-based analysis programs MEME (Mixed-Effects Model of Evolution [30]), FUBAR (Fast, Unconstrained Bayesian AppRoximation [31]), and BS-REL (Branch-site Random-effects Likelihood [30]), which are part of the HyPhy software suite [32], as executed in the Datamonkey webserver [33]. Chi-square with Yates correction was used to assess the overall magnitude of differences in the distributions of polymorphisms at synonymous and non-synonymous sites with respect to *PRNP* and *PRND* (<http://www.quantpsy.org/chisq/chisq.htm>).

## Results

### General nucleotide data

To facilitate a detailed comparative analysis between bovine *PRNP* and *PRND* variation, we computed the number of potentially synonymous and non-synonymous nucleotide sites [24, 25], the total number of synonymous and non-synonymous SNPs, and the number of synonymous and non-synonymous substitutions per site (Table 1). The coding sequence of bovine Doppel is 537 bp in length, and 6 SNPs were identified among the 228 samples at positions 141 (A/G), 149(A/G), 172(A/G), 285(C/T), 395(A/G), and 528(A/T). The three SNPs detected at sites 141, 285, and 528 were predicted to encode synonymous substitutions, while SNPs at positions 149, 172, and 395 were predicted to encode amino acid replacements (R50H, A58T, Q132R, respectively; IUB/IUPAC Amino Acid Codes). All 6 *PRND* polymorphisms were detected among samples representing *B. t. taurus* and the composite cattle, but only 3 were predicted in samples representing *B. t. indicus* cattle (141, 172, 395). Collectively, 30 synonymous SNPs and one non-synonymous SNP (S154N; *B. t. indicus* and composite cattle) were predicted in the coding sequences of bovine *PRNP*, as previously described [9].

### Haplotype data

The 31 polymorphic nucleotide sites in *PRNP* yielded 31 distinct haplotypes (S1 Table), with corresponding frequency distributions among *B. t. taurus*, *B. t. indicus*, and composite cattle

**Table 1. Nucleotide data for *PRND* and *PRNP* genes.**

|                      | #alleles | #syn sites <sup>a</sup> | # syn mut <sup>b</sup> | # non-syn sites <sup>c</sup> | # non-syn mut <sup>d</sup> | <i>d<sub>s</sub></i> <sup>e</sup> | <i>d<sub>N</sub></i> <sup>f</sup> | <i>d<sub>N</sub>/d<sub>s</sub></i> |
|----------------------|----------|-------------------------|------------------------|------------------------------|----------------------------|-----------------------------------|-----------------------------------|------------------------------------|
| <b><i>PRND</i></b>   |          |                         |                        |                              |                            |                                   |                                   |                                    |
| <i>B. t. taurus</i>  | 278      | 119.06                  | 3                      | 414.94                       | 3                          | 0.0036                            | 0.0013                            | 0.3705                             |
| <i>B. t. indicus</i> | 100      | 119.36                  | 1                      | 414.64                       | 2                          | 0.0028                            | 0.0024                            | 0.8514                             |
| Composite            | 78       | 119.12                  | 3                      | 414.88                       | 3                          | 0.0043                            | 0.0017                            | 0.3869                             |
| Total                | 456      | 119.14                  | 3                      | 414.86                       | 3                          | 0.0037                            | 0.0018                            | 0.4796                             |
| <b><i>PRNP</i></b>   |          |                         |                        |                              |                            |                                   |                                   |                                    |
| <i>B. t. taurus</i>  | 264      | 186.33                  | 23                     | 605.67                       | 0                          | 0.0064                            | 0.0000                            | 0.0000                             |
| <i>B. t. indicus</i> | 98       | 186.33                  | 10                     | 605.67                       | 1                          | 0.0102                            | 0.0003                            | 0.0255                             |
| Composite            | 75       | 186.33                  | 10                     | 605.67                       | 1                          | 0.0070                            | 0.0001                            | 0.0128                             |
| Total                | 437      | 186.33                  | 30                     | 605.67                       | 1                          | 0.0076                            | 0.0001                            | 0.0105                             |

<sup>a</sup> number of potentially synonymous sites

<sup>b</sup> number of synonymous mutations observed

<sup>c</sup> number of potentially non-synonymous sites

<sup>d</sup> number of non-synonymous mutations observed

<sup>e</sup> synonymous substitutions per site

<sup>f</sup> non-synonymous substitutions per site

doi:10.1371/journal.pone.0155924.t001

**Table 2. PRND haplotype data.**

| hap# <sup>a</sup> | 141 <sup>b</sup> | 149 <sup>b</sup> | 172 <sup>b</sup> | 285 <sup>b</sup> | 395 <sup>b</sup> | 528 <sup>b</sup> | % <i>B. t. taurus</i> | % <i>B. t. indicus</i> | % composite |
|-------------------|------------------|------------------|------------------|------------------|------------------|------------------|-----------------------|------------------------|-------------|
| 1                 | G                | G                | G                | C                | A                | T                | 69.49                 | 43.88                  | 62.50       |
| 2                 | G                | G                | G                | C                | G                | T                | 15.07                 | 19.39                  | 16.67       |
| 3                 | G                | G                | G                | T                | A                | A                | 0.37                  | 0.00                   | 0.00        |
| 4                 | G                | G                | G                | T                | G                | A                | 6.99                  | 0.00                   | 8.33        |
| 5                 | G                | G                | A                | C                | A                | T                | 0.00                  | 3.06                   | 0.00        |
| 6                 | G                | G                | A                | C                | G                | T                | 0.00                  | 13.27                  | 0.00        |
| 7                 | G                | A                | G                | C                | A                | T                | 2.94                  | 0.00                   | 4.17        |
| 8                 | G                | A                | G                | T                | G                | A                | 3.68                  | 0.00                   | 2.78        |
| 9                 | A                | G                | A                | C                | G                | T                | 1.47                  | 20.41                  | 5.56        |

<sup>a</sup> haplotype identifier

<sup>b</sup> nucleotide position in PRND

doi:10.1371/journal.pone.0155924.t002

that were similar to a previous PRNP analysis [16, 18]. The 6 polymorphic nucleotide sites in PRND produced 9 individual haplotypes (Table 2). PRND haplotypes #1 and #2 accounted for the majority of all haplotypes predicted in *B. t. taurus* (85%), *B. t. indicus* (63%), and composite (79%) cattle. Notably, four PRND haplotypes were exclusive to *B. t. taurus* in our samples, which resulted from 3 putative SNPs that were not detected among *B. t. indicus* cattle. Interestingly, haplotypes #5, #6, and #9 were identified primarily in *B. t. indicus* (37%) compared to *B. t. taurus* (1%; See Table 1). Median joining haplotype networks constructed as putative representations of bovine PRNP and PRND evolution (Fig 1) provide evidence for only a few major haplotypes as well as haplotype sharing across the three investigated bovine lineages (*B. t. taurus*, *B. t. indicus*, and composites). Moreover, specialized beef and dairy breeds could not be differentiated based on PRNP or PRND haplotypes, which is concordant with a recent study on bovine Toll-like receptor evolution [34].

### Tests of selection

The observed ratio of synonymous to non-synonymous polymorphisms predicted for bovine PRNP was highly skewed (30:1, respectively), whereas PRND exhibited no skewness (3:3, respectively). To further assess and compare the potential for functional and/or selective constraint(s) acting on bovine PRNP and PRND, we computed Tajima's D, Fu and Li's D\*, and Fu and Li's F\* (Table 3). All frequency distribution tests indicated that variation within bovine PRNP does not adhere to a strictly neutral model, which is concordant with a previous study demonstrating that bovine PRNP is subject to strong purifying selection [16]. In contrast, frequency distribution tests carried out for PRND revealed no evidence for departure from a strictly neutral model (Table 3).

The Z-test was conducted to determine if the rate of change between synonymous sites and non-synonymous sites was strictly neutral ( $d_N = d_S$ ) or directional ( $d_N < d_S$ ) for PRND and PRNP (Table 3). Variation within bovine PRND did not deviate from strict neutrality (Table 3). However, a significant deviation was noted for variation within bovine PRNP, and was consistent with purifying selection [9]. Though the direction of selection cannot accurately be determined within a population by the absolute value of the  $d_N/d_S$  ratio relative to one [35], differences in the magnitude of selective constraint(s) between the two genes may still be highlighted by the  $d_N/d_S$  ratio (i.e., PRND = 0.4796; PRNP = 0.0105). Moreover, using the chi-square test for non-integers with Yate's correction for continuity (two-tailed) to compare the number of synonymous polymorphisms and potentially synonymous nucleotide sites between

*PRNP*

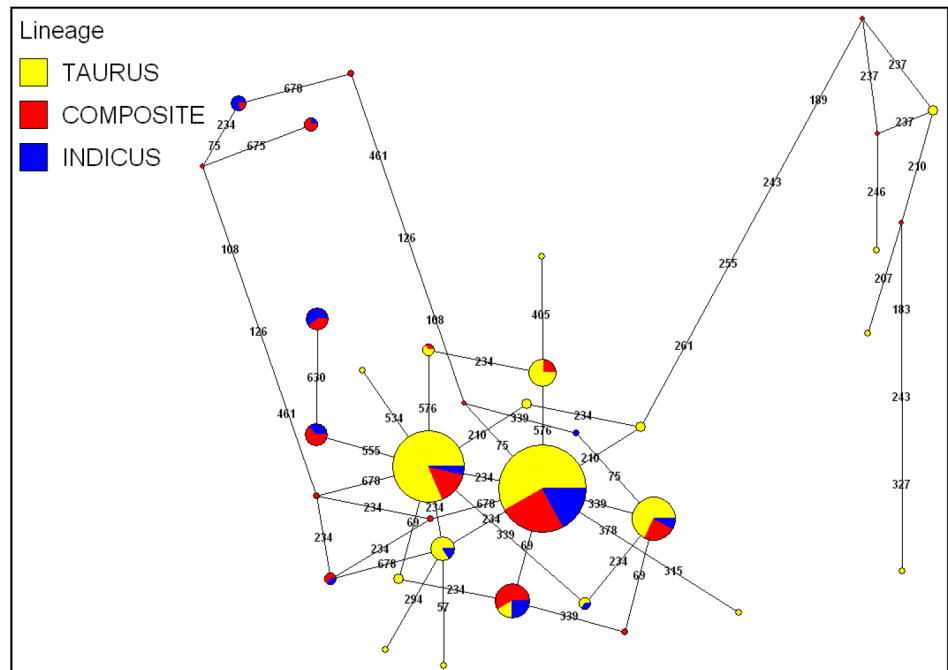

*PRND*

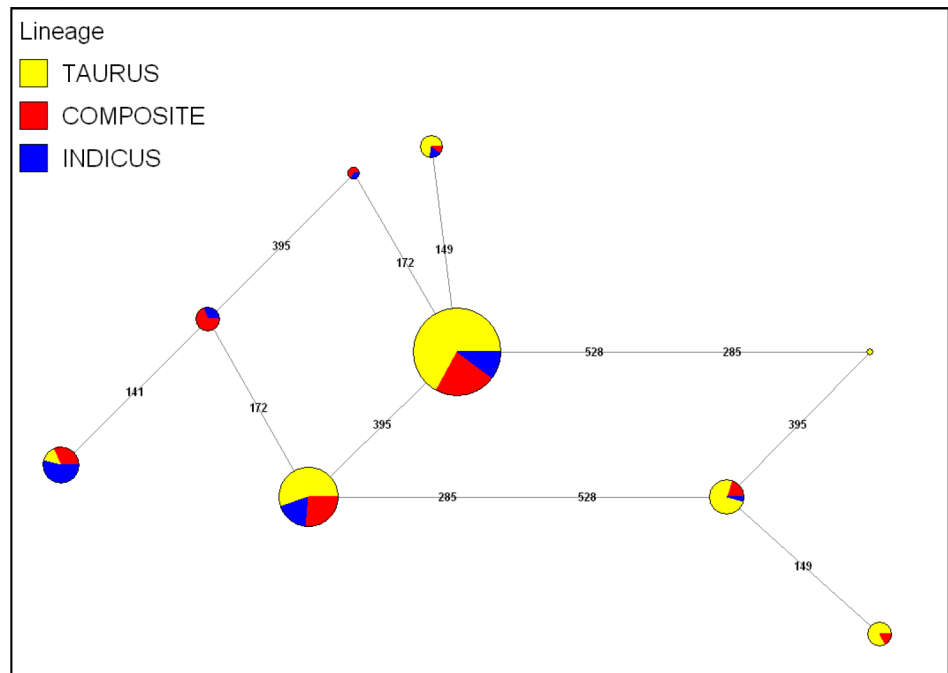

**Fig 1. Median joining haplotype networks for *PRNP* and *PRND*.** Median joining haplotype networks were constructed for bovine *PRNP* and *PRND* using character weights of 10 for SNPs and 20 for indels. Network branch angles were adjusted to ensure clarity without modifying branch lengths.

doi:10.1371/journal.pone.0155924.g001

**Table 3. Tests of selection for *PRND* and *PRNP* genes.**

|                      | Fu and Li D*       | Fu and Li F*       | Tajima's D         | Z-test $d_N = d_S$  | Z-test $d_N < d_S$ |
|----------------------|--------------------|--------------------|--------------------|---------------------|--------------------|
| <b><i>PRND</i></b>   |                    |                    |                    |                     |                    |
| <i>B. t. taurus</i>  | 1.04               | 0.84               | 0.07               | -0.871              | 0.917              |
| <i>B. t. indicus</i> | 0.83               | 1.48               | 2.21               | -0.117              | 0.116              |
| Composite            | 1.14               | 0.84               | -0.16              | -0.899              | 0.938              |
| All Cattle           | 1.00               | 1.01               | 0.55               | -0.800              | 0.824              |
| <b><i>PRNP</i></b>   |                    |                    |                    |                     |                    |
| <i>B. t. taurus</i>  | -4.89 <sup>a</sup> | -4.53 <sup>a</sup> | -2.00 <sup>a</sup> | -2.374 <sup>a</sup> | 2.435 <sup>a</sup> |
| <i>B. t. indicus</i> | 0.67               | 0.32               | -0.47              | -2.656 <sup>a</sup> | 2.756 <sup>a</sup> |
| Composite            | 0.04               | -0.54              | -1.39              | -2.341 <sup>a</sup> | 2.416 <sup>a</sup> |
| All Cattle           | -3.64 <sup>a</sup> | -3.55 <sup>a</sup> | -1.95 <sup>a</sup> | -2.753 <sup>a</sup> | 2.797 <sup>a</sup> |

<sup>a</sup> Statistically significant ( $P < 0.05$ )

doi:10.1371/journal.pone.0155924.t003

*PRNP* and *PRND* revealed a significant difference between the two genes ( $P = 0.005$ ), whereas the rate of nonsynonymous change was not found to differ ( $P = 0.413$ ). The difference in synonymous changes, but not nonsynonymous changes, further supports the supposition that bovine *PRNP* is under purifying selection, with selective signals that cannot be attributed to *PRND*.

To further clarify inferences drawn from our initial tests of selection, we also sought to investigate the potential for episodic selection within bovine *PRND* and *PRNP*. Analyses performed using the programs MEME and BS-REL [30] failed to detect evidence for episodic selection within *PRND* and *PRNP* (S1 File). Moreover, using the program FUBAR [31], we observed site-specific evidence for pervasive purifying selection within both *PRND* ( $n = 3$  sites/codons) and *PRNP* ( $n = 9$  sites/codons); whereas evidence for pervasive diversifying selection was only detected in *PRND* ( $n = 2$  sites/codons; S1 File). Collectively, these analyses further support the conclusion that nearly all nucleotide sites within the coding sequence of bovine *PRND* adhere to a strictly neutral model of molecular evolution, whereas the coding sequence of bovine *PRNP* is subject to intense purifying selection, thereby suggesting a potentially important role for bovine PrP.

## Discussion

Herein, we have demonstrated that strong purifying selection on bovine *PRNP* cannot be attributed to selective pressures that are acting on a neighboring coding region (i.e., *PRND*), as bovine *PRND* variation does not depart from a strictly neutral model of molecular evolution. We also show that *B. t. taurus* and *B. t. indicus* share the major haplotypes for both genes, thereby suggesting that the majority of the polymorphisms, and the differences in selective constraints between *PRNP* and *PRND*, likely occurred before taurine and indicine divergence.

Notably, we cannot dispute the fact that prion knockouts analyzed to date lack gross evidence of deleterious effects [36]. However, we do dispute the conclusion that a lack of deleterious effects suggests that *PRNP* is simply dispensable [5], as biological dispensability, the manifestation of disease, and evolutionary rate have a significant relationship [37–39]. Interestingly, prior analyses of essential genes, Mendelian disease genes, and complex disease genes, as compared to non-essential and non-disease genes, demonstrate evidence of strong purifying selection [38, 39]. Relevant to this study, a protein under intense purifying selection (i.e., bovine *PRNP*), with even a small but measureable fitness effect, may be essential for the functional viability of certain cells and their corresponding tissues [37, 40–42]. For this reason, it

should be noted that fitness effects may simply not have manifested in the controlled environmental conditions utilized for prion knockout cattle, or perhaps they were not recognizable through the limited assessment of these animals [5]. Examples exist in the literature of gene knock out effects observed to act only in a gender specific manner or in an age-dependent manner [43–46]. *PRNP* knockout mice have in fact been shown to have numerous subtle phenotypic differences [36]. Other than resistance to TSE, the first documented phenotypic change in PrP knockout mice was disturbances in sleep and altered circadian rhythms, as compared to wild-type mice, when housed in constant darkness [47, 48]. The knock out cattle used as evidence to suggest that *PRNP* is a dispensable gene were all castrated males studied as mature adults with no physiological or immunological stress placed on the animal(s). In general, given many accounts of gender-specific and age-specific effects observed for gene knockouts, as well as specific examples for *PRNP* reviewed by Steele and colleagues [36], it is possible that no gross changes were observed for castrated males under the carefully controlled environments (i.e., feeding and housing) used for the knock out cattle studies. These studies lack the exhaustive assessment of all developmental and physiological conditions necessary to assert any claims as to the biological dispensability of *PRNP*.

Fitness effect(s) or dispensability is not the only contribution to evolutionary rate. The number of protein-protein interactions has a strong correlation to both evolutionary rate and fitness [37]. Evidence that 30 different proteins likely interact with PrP [49], could at least, in part, explain the high degree of conservation commonly observed for the mammalian *PRNP* gene. Putative functional roles for PrP are likewise multifaceted with numerous cellular pathways influenced by PrP [50–52]. PrP has been shown to have a role in epithelial to mesenchymal transition [53], and several studies report protective roles for PrP, including protection against oxidative stress [54, 55]. PrP may also play a direct role in Alzheimer's disease, another neurodegenerative disorder [54, 56]. High levels of PrP expression are found in placenta, indicating a potential role in reproduction [57]; this role ties closely with evidence that Dpl and a third member of the prion gene family, Shadoo (Sho), can both interact with PrP, as well as function in place of PrP in aspects of reproduction [58]. Consistent with this is the observation that in the absence of PrP, aberrant expression of Dpl in the CNS results in mice that develop ataxia due to apoptosis of cerebellar cells [59], suggesting that Dpl is interacting with ligands that would normally interact with PrP. Expression of PrP in these tissues is sufficient to negate this effect [60]. Sho exhibits PrP-like neuroprotective properties with regard to Dpl-induced neurotoxicity in the CNS [49], indicating that Sho is also likely to be capable of interacting with the same ligands. A clear overlap of interactions exists between the various members of the prion gene family, which may be one plausible explanation for the lack of a discernable phenotype in *PRNP* knockout animals.

## Supporting Information

**S1 File. BSREL and FUBAR analysis output.**  
(DOCX)

**S1 Table. *PRNP* haplotype information.**  
(XLSX)

## Acknowledgments

Mention of trade names or commercial products in this article is solely for the purpose of providing specific information and does not imply recommendations or endorsement by the US Department of Agriculture. USDA is an equal opportunity provider and employer.



## Author Contributions

Conceived and designed the experiments: EMN BWB CMS. Performed the experiments: AMO. Analyzed the data: BWB CMS. Contributed reagents/materials/analysis tools: BWB CMS EMN. Wrote the paper: EMN BWB CMS AMO.

## References

1. Prusiner SB. Prions. *Proc Natl Acad Sci USA*. 1998; 95(23):13363–83. PMID: [9811807](#).
2. Nicholson EM. Detection of the disease-associated form of the prion protein in biological samples. *Bioanalysis*. 2015; 7(2):253–61. Epub 2015/01/15. doi: [10.4155/bio.14.301](#) PMID: [25587841](#).
3. Premzl M, Gamulin V. Comparative genomic analysis of prion genes. *BMC genomics*. 2007; 8:1. PMID: [17199895](#).
4. Schatzl HM, Da Costa M, Taylor L, Cohen FE, Prusiner SB. Prion protein gene variation among primates. *J Mol Biol*. 1995; 245(4):362–74. Epub 1995/01/27. S0022283684700301 [pii]. PMID: [7837269](#).
5. Richt JA, Kasinathan P, Hamir AN, Castilla J, Sathiyaseelan T, Vargas F, et al. Production of cattle lacking prion protein. *Nat Biotechnol*. 2007; 25(1):132–8. Epub 2007/01/02. nbt1271 [pii] doi: [10.1038/nbt1271](#) PMID: [17195841](#); PubMed Central PMCID: PMC2813193.
6. Yu G, Chen J, Yu H, Liu S, Chen J, Xu X, et al. Functional disruption of the prion protein gene in cloned goats. *The Journal of general virology*. 2006; 87(Pt 4):1019–27. Epub 2006/03/11. doi: [10.1099/vir.0.81384-0](#) PMID: [16528053](#).
7. Bueler H, Fischer M, Lang Y, Bluethmann H, Lipp HP, DeArmond SJ, et al. Normal development and behaviour of mice lacking the neuronal cell-surface PrP protein. *Nature*. 1992; 356(6370):577–82. Epub 1992/04/16. doi: [10.1038/356577a0](#) PMID: [1373228](#).
8. Richt JA, Hall SM. BSE case associated with prion protein gene mutation. *PLoS Pathog*. 2008; 4(9): e1000156. PMID: [18787697](#). doi: [10.1371/journal.ppat.1000156](#)
9. Seabury CM, Honeycutt RL, Rooney AP, Halbert ND, Derr JN. Prion protein gene (*PRNP*) variants and evidence for strong purifying selection in functionally important regions of bovine exon 3. *Proc Natl Acad Sci USA*. 2004; 101(42):15142–7. PMID: [15477588](#).
10. Piontkivska H, Rooney AP, Nei M. Purifying selection and birth-and-death evolution in the histone H4 gene family. *Molecular biology and evolution*. 2002; 19(5):689–97. PMID: [11961102](#).
11. Nei M, Rogozin IB, Piontkivska H. Purifying selection and birth-and-death evolution in the ubiquitin gene family. *Proc Natl Acad Sci U S A*. 2000; 97(20):10866–71. PMID: [11005860](#).
12. Hateboer G, Gennissen A, Ramos YF, Kerkhoven RM, Sonntag-Buck V, Stunnenberg HG, et al. BS69, a novel adenovirus E1A-associated protein that inhibits E1A transactivation. *Embo J*. 1995; 14(13):3159–69. PMID: [7621829](#).
13. Rondena M, Cecilian F, Comazzi S, Pocacqua V, Bazzocchi C, Luvoni C, et al. Identification of bovine doppel protein in testis, ovary and ejaculated spermatozoa. *Theriogenology*. 2005; 63(4):1195–206. PMID: [15710203](#).
14. Mastrangelo P, Westaway D. The prion gene complex encoding PrP(C) and Doppel: insights from mutational analysis. *Gene*. 2001; 275(1):1–18. Epub 2001/09/28. PMID: [11574147](#).
15. Tsangaras K, Kolokotronis SO, Ulrich RG, Morand S, Michaux J, Greenwood AD. Negative purifying selection drives prion and doppel protein evolution. *Journal of molecular evolution*. 2014; 79(1–2):12–20. Epub 2014/07/21. doi: [10.1007/s00239-014-9632-1](#) PMID: [25038839](#).
16. Brunelle BW, Greenlee JJ, Seabury CM, Brown CE 2nd, Nicholson EM. Frequencies of polymorphisms associated with BSE resistance differ significantly between *Bos taurus*, *Bos indicus*, and composite cattle. *BMC veterinary research*. 2008; 4:36. Epub 2008/09/24. doi: [10.1186/1746-6148-4-36](#) PMID: [18808703](#); PubMed Central PMCID: PMC2569919.
17. Brunelle BW, Kehrl ME Jr., Stabel JR, Spurlock DM, Hansen LB, Nicholson EM. Short communication: Allele, genotype, and haplotype data for bovine spongiform encephalopathy-resistance polymorphisms from healthy US Holstein cattle. *Journal of dairy science*. 2008; 91(1):338–42. Epub 2007/12/22. doi: [10.3168/jds.2007-0423](#) PMID: [18096956](#).
18. Seabury CM, Womack JE, Piedrahita J, Derr JN. Comparative *PRNP* genotyping of U.S. cattle sires for potential association with BSE. *Mamm Genome*. 2004; 15(10):828–33. PMID: [15520885](#).
19. Thompson JD, Gibson TJ, Higgins DG. Multiple sequence alignment using ClustalW and ClustalX. *Curr Protoc Bioinformatics*. 2002;Chapter 2:Unit 2 3. PMID: [18792934](#).
20. Stephens M, Scheet P. Accounting for decay of linkage disequilibrium in haplotype inference and missing-data imputation. *American journal of human genetics*. 2005; 76(3):449–62. PMID: [15700229](#).

21. Stephens M, Smith NJ, Donnelly P. A new statistical method for haplotype reconstruction from population data. *American journal of human genetics*. 2001; 68(4):978–89. PMID: [11254454](#).
22. Seabury CM, Seabury PM, Decker JE, Schnabel RD, Taylor JF, Womack JE. Diversity and evolution of 11 innate immune genes in *Bos taurus taurus* and *Bos taurus indicus* cattle. *Proc Natl Acad Sci U S A*. 2010; 107(1):151–6. PMID: [20018671](#). doi: [10.1073/pnas.0913006107](#)
23. Librado P, Rozas J. DnaSP v5: a software for comprehensive analysis of DNA polymorphism data. *Bioinformatics*. 2009; 25(11):1451–2. PMID: [19346325](#). doi: [10.1093/bioinformatics/btp187](#)
24. Lynch M, Crease TJ. The analysis of population survey data on DNA sequence variation. *Molecular biology and evolution*. 1990; 7(4):377–94. PMID: [1974693](#).
25. Nei M, Gojobori T. Simple methods for estimating the numbers of synonymous and nonsynonymous nucleotide substitutions. *Molecular biology and evolution*. 1986; 3(5):418–26. PMID: [3444411](#).
26. Tamura K, Dudley J, Nei M, Kumar S. MEGA4: Molecular Evolutionary Genetics Analysis (MEGA) software version 4.0. *Molecular biology and evolution*. 2007; 24(8):1596–9. PMID: [17488738](#).
27. Tajima F. Statistical method for testing the neutral mutation hypothesis by DNA polymorphism. *Genetics*. 1989; 123(3):585–95. PMID: [2513255](#).
28. Fu YX, Li WH. Statistical tests of neutrality of mutations. *Genetics*. 1993; 133(3):693–709. PMID: [8454210](#).
29. Kosakovsky Pond SL, Posada D, Gravenor MB, Woelk CH, Frost SD. GARD: a genetic algorithm for recombination detection. *Bioinformatics*. 2006; 22(24):3096–8. doi: [10.1093/bioinformatics/btl474](#) PMID: [17110367](#).
30. Kosakovsky Pond SL, Murrell B, Fourment M, Frost SD, Delpont W, Scheffler K. A random effects branch-site model for detecting episodic diversifying selection. *Molecular biology and evolution*. 2011; 28(11):3033–43. doi: [10.1093/molbev/msr125](#) PMID: [21670087](#); PubMed Central PMCID: PMC3247808.
31. Murrell B, Wertheim JO, Moola S, Weighill T, Scheffler K, Kosakovsky Pond SL. Detecting individual sites subject to episodic diversifying selection. *PLoS genetics*. 2012; 8(7):e1002764. doi: [10.1371/journal.pgen.1002764](#) PMID: [22807683](#); PubMed Central PMCID: PMC3395634.
32. Pond SL, Frost SD, Muse SV. HyPhy: hypothesis testing using phylogenies. *Bioinformatics*. 2005; 21(5):676–9. doi: [10.1093/bioinformatics/bti079](#) PMID: [15509596](#).
33. Delpont W, Poon AF, Frost SD, Kosakovsky Pond SL. Datamonkey 2010: a suite of phylogenetic analysis tools for evolutionary biology. *Bioinformatics*. 2010; 26(19):2455–7. doi: [10.1093/bioinformatics/btq429](#) PMID: [20671151](#); PubMed Central PMCID: PMC2944195.
34. Fisher CA, Bhattarai EK, Osterstock JB, Dowd SE, Seabury PM, Vikram M, et al. Evolution of the bovine TLR gene family and member associations with *Mycobacterium avium* subspecies *paratuberculosis* infection. *PLoS one*. 2011; 6(11):e27744. doi: [10.1371/journal.pone.0027744](#) PMID: [22164200](#); PubMed Central PMCID: PMC3227585.
35. Kryazhimskiy S, Plotkin JB. The population genetics of dN/dS. *PLoS genetics*. 2008; 4(12):e1000304. PMID: [19081788](#). doi: [10.1371/journal.pgen.1000304](#)
36. Steele AD, Lindquist S, Aguzzi A. The prion protein knockout mouse: a phenotype under challenge. *Prion*. 2007; 1(2):83–93. Epub 2007/04/01. PMID: [19164918](#); PubMed Central PMCID: PMC2634447.
37. Fraser HB, Wall DP, Hirsh AE. A simple dependence between protein evolution rate and the number of protein-protein interactions. *BMC evolutionary biology*. 2003; 3:11. doi: [10.1186/1471-2148-3-11](#) PMID: [12769820](#); PubMed Central PMCID: PMC166126.
38. Cai JJ, Borenstein E, Chen R, Petrov DA. Similarly strong purifying selection acts on human disease genes of all evolutionary ages. *Genome biology and evolution*. 2009; 1:131–44. doi: [10.1093/gbe/evp013](#) PMID: [20333184](#); PubMed Central PMCID: PMC2817408.
39. Georgi B, Voight BF, Bucan M. From mouse to human: evolutionary genomics analysis of human orthologs of essential genes. *PLoS genetics*. 2013; 9(5):e1003484. doi: [10.1371/journal.pgen.1003484](#) PMID: [23675308](#); PubMed Central PMCID: PMC3649967.
40. Hirsh AE, Fraser HB. Protein dispensability and rate of evolution. *Nature*. 2001; 411(6841):1046–9. doi: [10.1038/35082561](#) PMID: [11429604](#).
41. Jeong H, Mason SP, Barabasi AL, Oltvai ZN. Lethality and centrality in protein networks. *Nature*. 2001; 411(6833):41–2. doi: [10.1038/35075138](#) PMID: [11333967](#).
42. Jordan IK, Wolf YI, Koonin EV. No simple dependence between protein evolution rate and the number of protein-protein interactions: only the most prolific interactors tend to evolve slowly. *BMC evolutionary biology*. 2003; 3:1. PMID: [12515583](#); PubMed Central PMCID: PMC140311.

43. Nakamura BN, Lawson G, Chan JY, Banuelos J, Cortes MM, Hoang YD, et al. Knockout of the transcription factor Nrf2 disrupts spermatogenesis in an age-dependent manner. *Free radical biology & medicine*. 2010; 49(9):1368–79. doi: [10.1016/j.freeradbiomed.2010.07.019](https://doi.org/10.1016/j.freeradbiomed.2010.07.019) PMID: [20692336](https://pubmed.ncbi.nlm.nih.gov/20692336/).
44. Karatayev O, Baylan J, Weed V, Chang S, Wynick D, Leibowitz SF. Galanin knockout mice show disturbances in ethanol consumption and expression of hypothalamic peptides that stimulate ethanol intake. *Alcohol Clin Exp Res*. 2010; 34(1):72–80. PMID: [19860804](https://pubmed.ncbi.nlm.nih.gov/19860804/). doi: [10.1111/j.1530-0277.2009.01068.x](https://doi.org/10.1111/j.1530-0277.2009.01068.x)
45. Plackett TP, Gamelli RL, Kovacs EJ. Gender-based differences in cytokine production after burn injury: a role of interleukin-6. *J Am Coll Surg*. 2010; 210(1):73–8. PMID: [20123335](https://pubmed.ncbi.nlm.nih.gov/20123335/). doi: [10.1016/j.jamcollsurg.2009.09.019](https://doi.org/10.1016/j.jamcollsurg.2009.09.019)
46. Yi X, Xu L, Kim K, Kim HS, Maeda N. Genetic reduction of lipoic acid synthase expression modestly increases atherosclerosis in male, but not in female, apolipoprotein E-deficient mice. *Atherosclerosis*. 2010; 211(2):424–30. PMID: [20347443](https://pubmed.ncbi.nlm.nih.gov/20347443/). doi: [10.1016/j.atherosclerosis.2010.03.009](https://doi.org/10.1016/j.atherosclerosis.2010.03.009)
47. Tobler I, Gaus SE, Deboer T, Achermann P, Fischer M, Rulicke T, et al. Altered circadian activity rhythms and sleep in mice devoid of prion protein. *Nature*. 1996; 380(6575):639–42. Epub 1996/04/18. doi: [10.1038/380639a0](https://doi.org/10.1038/380639a0) PMID: [8602267](https://pubmed.ncbi.nlm.nih.gov/8602267/).
48. Tobler I, Deboer T, Fischer M. Sleep and sleep regulation in normal and prion protein-deficient mice. *The Journal of neuroscience: the official journal of the Society for Neuroscience*. 1997; 17(5):1869–79. Epub 1997/03/01. PMID: [9030645](https://pubmed.ncbi.nlm.nih.gov/9030645/).
49. Watts JC, Westaway D. The prion protein family: diversity, rivalry, and dysfunction. *Biochimica et biophysica acta*. 2007; 1772(6):654–72. PMID: [17562432](https://pubmed.ncbi.nlm.nih.gov/17562432/).
50. Halliez S, Passet B, Martin-Lannere S, Hernandez-Rapp J, Laude H, Mouillet-Richard S, et al. To develop with or without the prion protein. *Frontiers in cell and developmental biology*. 2014; 2:58. doi: [10.3389/fcell.2014.00058](https://doi.org/10.3389/fcell.2014.00058) PMID: [25364763](https://pubmed.ncbi.nlm.nih.gov/25364763/); PubMed Central PMCID: PMC4207017.
51. Ochs K, Malaga-Trillo E. Common themes in PrP signaling: the Src remains the same. *Frontiers in cell and developmental biology*. 2014; 2:63. doi: [10.3389/fcell.2014.00063](https://doi.org/10.3389/fcell.2014.00063) PMID: [25364767](https://pubmed.ncbi.nlm.nih.gov/25364767/); PubMed Central PMCID: PMC4211543.
52. Roucou X. Regulation of PrP(C) signaling and processing by dimerization. *Frontiers in cell and developmental biology*. 2014; 2:57. doi: [10.3389/fcell.2014.00057](https://doi.org/10.3389/fcell.2014.00057) PMID: [25364762](https://pubmed.ncbi.nlm.nih.gov/25364762/); PubMed Central PMCID: PMC4207009.
53. Mehrabian M, Ehsani S, Schmitt-Ulms G. An emerging role of the cellular prion protein as a modulator of a morphogenetic program underlying epithelial-to-mesenchymal transition. *Frontiers in cell and developmental biology*. 2014; 2:53. doi: [10.3389/fcell.2014.00053](https://doi.org/10.3389/fcell.2014.00053) PMID: [25453033](https://pubmed.ncbi.nlm.nih.gov/25453033/); PubMed Central PMCID: PMC4233941.
54. Black SA, Stys PK, Zamponi GW, Tsutsui S. Cellular prion protein and NMDA receptor modulation: protecting against excitotoxicity. *Frontiers in cell and developmental biology*. 2014; 2:45. doi: [10.3389/fcell.2014.00045](https://doi.org/10.3389/fcell.2014.00045) PMID: [25364752](https://pubmed.ncbi.nlm.nih.gov/25364752/); PubMed Central PMCID: PMC4207032.
55. Sakudo A, Onodera T. Prion protein (PrP) gene-knockout cell lines: insight into functions of the PrP. *Frontiers in cell and developmental biology*. 2014; 2:75. doi: [10.3389/fcell.2014.00075](https://doi.org/10.3389/fcell.2014.00075) PMID: [25642423](https://pubmed.ncbi.nlm.nih.gov/25642423/); PubMed Central PMCID: PMC4295555.
56. Watt NT, Griffiths HH, Hooper NM. Lipid rafts: linking prion protein to zinc transport and amyloid-beta toxicity in Alzheimer's disease. *Frontiers in cell and developmental biology*. 2014; 2:41. doi: [10.3389/fcell.2014.00041](https://doi.org/10.3389/fcell.2014.00041) PMID: [25364748](https://pubmed.ncbi.nlm.nih.gov/25364748/); PubMed Central PMCID: PMC4206978.
57. Makzhami S, Passet B, Halliez S, Castille J, Moazami-Goudarzi K, Duchesne A, et al. The prion protein family: a view from the placenta. *Frontiers in cell and developmental biology*. 2014; 2:35. doi: [10.3389/fcell.2014.00035](https://doi.org/10.3389/fcell.2014.00035) PMID: [25364742](https://pubmed.ncbi.nlm.nih.gov/25364742/); PubMed Central PMCID: PMC4207016.
58. Allais-Bonnet A, Pailhoux E. Role of the prion protein family in the gonads. *Frontiers in cell and developmental biology*. 2014; 2:56. doi: [10.3389/fcell.2014.00056](https://doi.org/10.3389/fcell.2014.00056) PMID: [25364761](https://pubmed.ncbi.nlm.nih.gov/25364761/); PubMed Central PMCID: PMC4207050.
59. Moore RC, Lee IY, Silverman GL, Harrison PM, Strome R, Heinrich C, et al. Ataxia in prion protein (PrP)-deficient mice is associated with upregulation of the novel PrP-like protein doppel. *J Mol Biol*. 1999; 292(4):797–817. PMID: [10525406](https://pubmed.ncbi.nlm.nih.gov/10525406/).
60. Moore RC, Mastrangelo P, Bouzamondo E, Heinrich C, Legname G, Prusiner SB, et al. Doppel-induced cerebellar degeneration in transgenic mice. *Proc Natl Acad Sci U S A*. 2001; 98(26):15288–93. PMID: [11734625](https://pubmed.ncbi.nlm.nih.gov/11734625/).
